# Supplementary material for: Trans-Cinnamaldehyde Eluting Porous Silicon Microparticles Mitigate Cariogenic Biofilms
Source: MDPI journal article supplement (doi:10.3390/pharmaceutics14071428), 2022-07-07
Supplement: s1 [file s1]

**Table S1: Primer list for dual species biofilms of *S. mutans* and *C. albicans*.** 16srRNA and ACT1 were used as the house keeping gene for *S. mutans* and *C. albicans* respectively.

| S.no | Gene           | Forward Primer Sequence (5' – 3') | Reverse Primer Sequence (5' – 3') | Ref |
|------|----------------|-----------------------------------|-----------------------------------|-----|
| 1    | <i>gtfB</i>    | AAACAACCGAAGCTGATAC               | CAATTTCTTTTACATTGGGAAG            | [1] |
| 2    | <i>gtfC</i>    | GGTTTAACGTCAAAATTAGCTGT<br>ATTAGC | CTCAACCAACCGCCACTGTT              | [2] |
| 3    | <i>LuxS</i>    | ACTGTTCCCCTTTTGGCTGTC             | AACTTGCTTTGATGACTGTGGC            | [2] |
| 4    | <i>brpA</i>    | GGAGGAGCTGCATCAGGATTC             | AACTCCAGCACATCCAGCAAG             | [2] |
| 5    | <i>nox1</i>    | GGACAAGAATCTGGTGTGA               | CAATATCAGTCTCTACCTTAGG<br>C       | [1] |
| 6    | <i>atpD</i>    | CCAGGCGGTTTCATTCATCTGAC           | GGCGGGATTTCGGTATTACTG             | [2] |
| 7    | <i>DnaK</i>    | GGTACAACAACTCAGCAGTTGC<br>AGTTCTT | CCCCATCTTAGATTGATGGAA<br>AGAATTGT | [2] |
| 8    | <i>16srRNA</i> | CCTACGGGAGGCAGCAGTAG              | CAACAGAGCTTTACGATCCGA<br>AA       | [2] |
| 9    | <i>BGL2</i>    | ATGGGTGATTTGGCTTTCAA              | CAGCTGGACCAAGGTTTTGT              | [1] |
| 10   | <i>PHR1</i>    | GGTTTGGTTCTGGTTGATGG              | AGCAGCAGTTCCTGGACATT              | [1] |
| 11   | <i>PHR2</i>    | CTCCTCCATTTCCAGAACCA              | CGTCTGAATCAACCTTGTCG              | [1] |
| 12   | <i>ACT1</i>    | ATTCGGTGAGTAATCCTA                | GTATAGTCCAGATAACAACA              | [1] |

## References

1. Lobo, C.I.V.; Rinaldi, T.B.; Christiano, C.M.S.; de Sales Leite, L.; Barbugli, P.A.; Klein, M.I. Dual-species biofilms of *Streptococcus mutans* and *Candida albicans* exhibit more biomass and are mutually beneficial compared with single-species biofilms. *J. Oral Microbiol.* **2019**, *11*, 1581520. <https://doi.org/10.1080/20002297.2019.1581520>.
2. Balasubramanian, A.R.; Vasudevan, S.; Shanmugam, K.; Lévesque, C.M.; Solomon, A.P.; Neelakantan, P. Combinatorial effects of trans-cinnamaldehyde with fluoride and chlorhexidine on *Streptococcus mutans*. *J. Appl. Microbiol.* **2021**, *130*, 382–393. <https://doi.org/10.1111/jam.14794>.

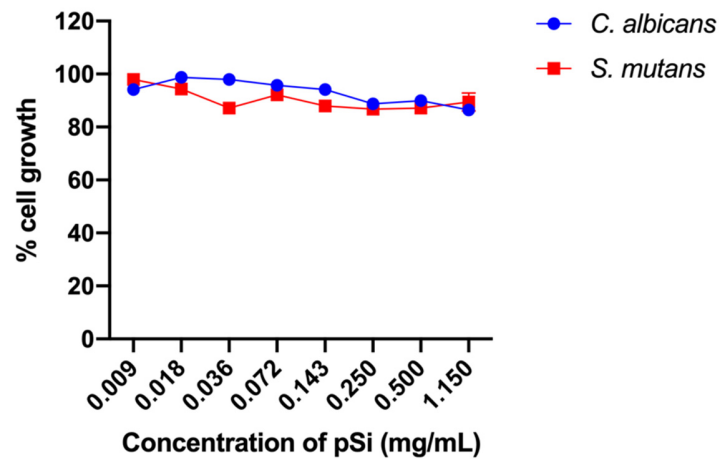

**Figure S1.: Effect of the porous silicon on the planktonic growth of *S. mutans* and *C. albicans*.** Concentrations ranging from 1.15-0.009 mg/ml were tested against the mono species cultures of *S. mutans* and *C. albicans*, the results showed that the pSi alone did not show any effect of the growth of the organisms when compared to control.

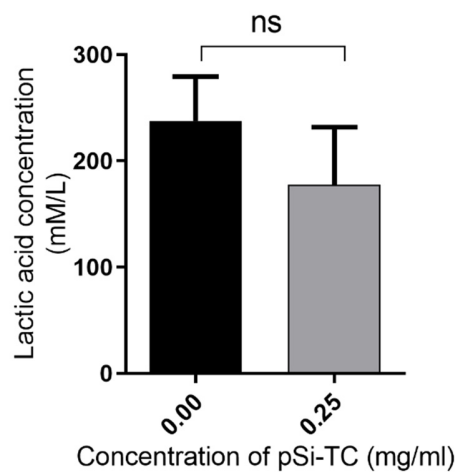

**Figure S2.: Effect of pSi-TC on lactic acid accumulation.** pSi-TC reduced lactic acid accumulation in dual-species biofilms by 25.11%, when compared to the control. ns denotes not significant  $p > 0.05$ .

Filename: pharmaceuticals-1781839-supplementary.docx  
Directory: E:\7.7\pharmaceuticals-1793104  
Template: C:\Users\MDPI\AppData\Roaming\Microsoft\Templates\Normal.  
dotm  
Title:  
Subject:  
Author: shanthini  
Keywords:  
Comments:  
Creation Date: 7/6/2022 11:42:00 PM  
Change Number: 9  
Last Saved On: 7/7/2022 4:48:00 PM  
Last Saved By: MDPI  
Total Editing Time: 6 Minutes  
Last Printed On: 7/7/2022 4:48:00 PM  
As of Last Complete Printing  
Number of Pages: 2  
Number of Words: 284 (approx.)  
Number of Characters: 1,990 (approx.)
